# Supplementary material for: Effect of Asbestos Consumption on Malignant Pleural Mesothelioma in Italy: Forecasts of Mortality up to 2040
Source: MDPI journal article supplement (doi:10.3390/cancers13133338), 2021-07-03
Supplement: s1 [file s1]

# Supplementary Materials: Effect of Asbestos Consumption on Malignant Pleural Mesothelioma in Italy: Forecasts of Mortality up to 2040

Enrico Oddone, Jordy Bollon, Consuelo Rubina Nava, Dario Consonni, Alessandro Marinaccio <sup>6</sup>, Corrado Magnani, Antonio Gasparrini and Francesco Barone-Adesi

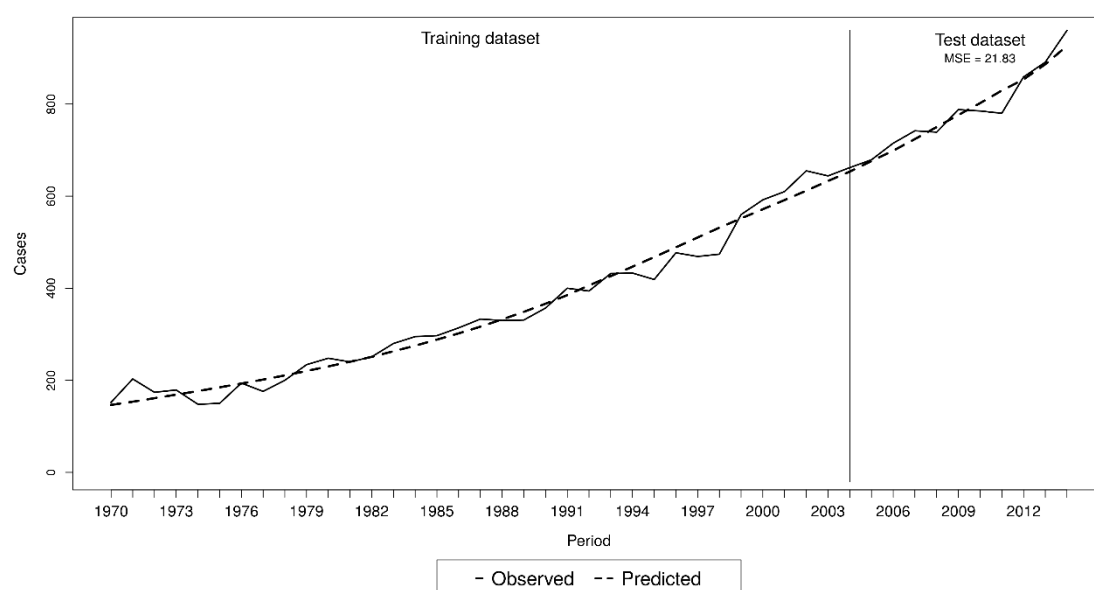

**Figure S1.** Performance of the main model on the test dataset.

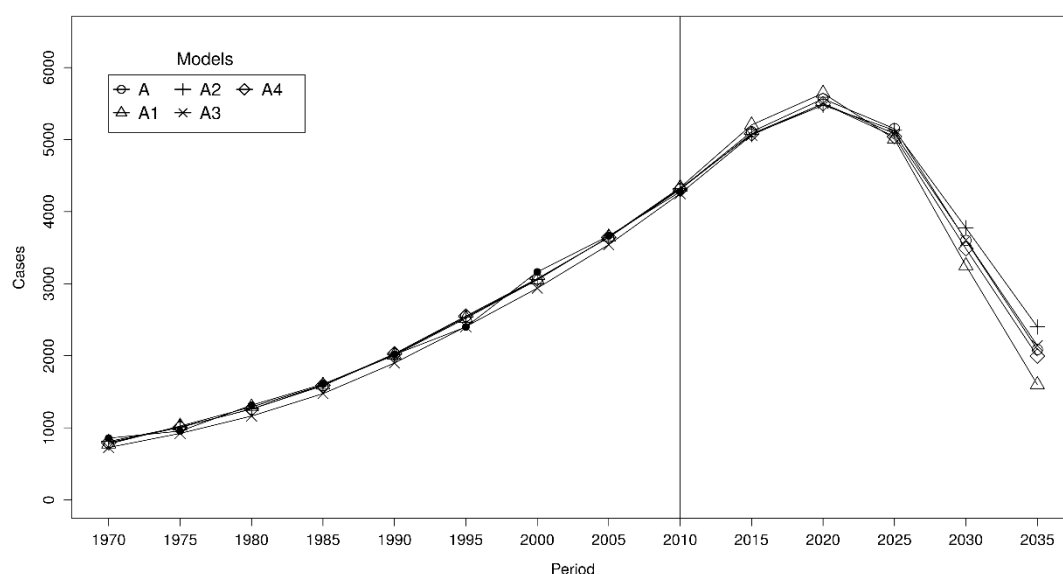

**Figure S2.** Models predictions under different assumptions. A is the best model with an exposure age (EA) equal to 20–70 years old, an asbestos exposure (AE) after 1992 equal to 10%, a maximum lag of 60 years, an AE before 1946 equal to the AE observed in 1946, analysis restricted to cases aged 25–89 years old. A1: equal to A, except for the EA assumed to be 15–

70 years old. A2: equal to A, except for the AE assumed to be 20–65 years old. A3: equal to A, except for the restriction of analysis to cases aged 50–89 years old. A4: equal to A, except for AE before 1946, assumed to linearly increase from 1881 to 1946. Black dots indicate the observed cases.

**Table S1.** Comparison between different models.

| <b>Models</b> | <b>Age Range for Asbestos Exposure</b> | <b>Post-ban Exposure, Expressed as Percentage of the Exposure in 1992</b> | <b>Test MSE</b> |
|---------------|----------------------------------------|---------------------------------------------------------------------------|-----------------|
| A             | 20–70                                  | 10%                                                                       | 21.83           |
| B             | 20–70                                  | 5%                                                                        | 22.53           |
| C             | 20–70                                  | 20%                                                                       | 22.76           |
| D             | 20–65                                  | 10%                                                                       | 22.85           |
| E             | 20–65                                  | 5%                                                                        | 22.98           |
| F             | 20–65                                  | 20%                                                                       | 23.39           |
| G             | 20–65                                  | 30%                                                                       | 25.24           |
| H             | 20–70                                  | 30%                                                                       | 26.91           |
| I             | 15–70                                  | 5%                                                                        | 30.41           |
| J             | 15–70                                  | 10%                                                                       | 36.84           |
| K             | 15–65                                  | 10%                                                                       | 37.23           |
| L             | 15–65                                  | 5%                                                                        | 41.63           |
| M             | 15–65                                  | 20%                                                                       | 43.25           |
| M             | 15–70                                  | 30%                                                                       | 44.68           |
| N             | 15–70                                  | 20%                                                                       | 51.55           |
| O             | 15–65                                  | 30%                                                                       | 66.04           |
